# Supplementary material for: Long COVID in Children, Adults, and Vulnerable Populations: A Comprehensive Overview for an Integrated Approach
Source: MDPI journal article supplement (doi:10.3390/diseases12050095), 2024-05-06
Supplement: s1 [file s1]

**Supplementary Materials:**

**Document S1.** Long-covid questionnaire for adults

**ADULT PATIENTS**

**Patient description**

Patient ID: \_\_\_\_\_

Date of birth or age at the date of SARS-CoV-2 infection: \_\_\_\_\_

Ethnic group: ☐ Arab ☐ Black ☐ Asian ☐ Latin American ☐ White ☐ Other: \_\_\_\_\_

Sex: ☐ Female ☐ Male

If female, pregnancy:

- ☐ No
- ☐ Yes, before SARS-CoV-2 infection
- ☐ Yes, during SARS-CoV-2 infection (and other pregnancy before infection)

Date of SARS-CoV-2 infection: \_\_ / \_\_ / \_\_\_\_

Vaccination status at the time of infection:

- Seasonal Influenza ☐ Yes ☐ No
- SARS-CoV-2 ☐ Yes ☐ No

If YES, please indicate the number of doses of SARS-CoV-2 vaccine: ☐ 0 ☐ 1 ☐ 2 ☐ 3 ☐ >3

Date of the last dose of SARS-CoV-2 vaccine: \_\_ / \_\_ / \_\_\_\_

Symptomatic onset:

- ☐ No (incidental diagnosis)
- ☐ Yes (diagnosis following compatible symptoms)

Symptoms during the acute infection:

- ☐ Fever
- ☐ Cough
- ☐ Rhinorrhea
- ☐ Sore throat
- ☐ Fatigue
- ☐ Nausea
- ☐ Vomiting
- ☐ Diarrhea
- ☐ Myalgia
- ☐ Arthralgia
- ☐ Headache
- ☐ Conjunctival congestion
- ☐ Exertional dyspnea
- ☐ Dyspnea at rest
- ☐ Anosmia
- ☐ Skin manifestations
- ☐ Tachycardia

Admission:

- ☐ No

- ☐ Emergency Room
- ☐ Hospitalization in a department

Hospitalization:

- ☐ No
- ☐ Yes, no oxygen therapy needed
- ☐ Yes, oxygen therapy non- invasive ventilation required
- ☐ Yes, oxygen therapy invasive ventilation required

Medications:

- ☐ Corticosteroid
- ☐ Antiviral agents (Lopinavir-Ritonavir, Arbidol, Chloroquine phosphate, Hydroxychloroquine)
- ☐ Antibiotics
- ☐ Heparin

Comorbidities:

- ☐ Hypertension
- ☐ Diabetes
- ☐ Cardiovascular diseases
- ☐ Cerebrovascular diseases
- ☐ Malignant tumor in follow-up
- ☐ Malignant tumor in treatment
- ☐ COPD
- ☐ Chronic kidney disease
- ☐ Obesity
- ☐ Immunosuppression
- ☐ Psychiatric diseases

Weight at the date of infection: \_\_\_\_\_ Kg

Height at the date of infection: \_\_\_\_\_ m

### **Post COVID Syndrome**

Respiratory problems: ☐ No ☐ Yes

If YES, which symptoms?

- ☐ Dyspnea
- ☐ Cough
- ☐ Sore throat

Possible responses:

- ☐ No, never
- ☐ No, symptom resolved
- ☐ Yes, even before infection
- ☐ Yes, after acute infection

Fatigue? ☐ No ☐ Yes

If YES, which problems?

- ☐ Fatigue/deep general tiredness
- ☐ Tiredness in activities of daily living

Any problems in movements of limbs and face? ☐ No ☐ Yes

If YES, which problems?

- ☐ Slowing down in the execution of movements
- ☐ Tremor/involuntary movements of limbs
- ☐ Weakness/inability to move limbs (> 1 hour)
- ☐ Loss of sensibility/ tingles/ burning in the limbs (> 1 hour)
- ☐ Walking problems
- ☐ Vertigo
- ☐ Complete or partial facial paralysis
- ☐ Urinal/ fecal incontinence

Myalgia/ joints pain/ chest pain/ headache/ facial pain? ☐ No ☐ Yes

If YES, which ones?

- ☐ Severe myalgia
- ☐ Arthromyalgia
- ☐ Chest pain
- ☐ Facial pain
- ☐ Headache

Any problems with taste/ smell/ vision or dizziness? ☐ No ☐ Yes

If YES, which problems involving sense organs?

- ☐ Alteration of taste
- ☐ Alteration of smell
- ☐ Diplopia (> 1 hour)
- ☐ Blurred vision (> 1 hour)

Loss of consciousness/ brain fog/ cognitive problems? ☐ No ☐ Yes

If YES, which neurological/ cognitive disorders?

- ☐ Loss of consciousness
- ☐ Loss of contact with your surrounding environment
- ☐ Problems speaking/ understanding what people are saying to you
- ☐ Problems with orientation outside your home
- ☐ Trouble remembering what day it is
- ☐ Trouble remembering the names of relatives and friends
- ☐ Episodes of uncontrolled laughter or crying
- ☐ Irritability/ reactivity towards others

Any sleep problems? ☐ No ☐ Yes

If YES, which ones?

- ☐ Insomnia
- ☐ Poor sleep quality
- ☐ Daytime sleepiness
- ☐ Night sweats

Any psychiatric symptoms? ☐ No ☐ Yes

If YES, which ones?

- ☐ Anxiety symptoms

- ☐ Mood deflection
- ☐ Suicidal thoughts
- ☐ Flash back
- ☐ Obsession and/or compulsions

Any gastrointestinal symptoms? ☐ No ☐ Yes

If YES, which symptoms?

- ☐ Weight loss
- ☐ Diarrhea
- ☐ Gastric pain
- ☐ Abdominal pain
- ☐ Constipation

Dermatological diseases? ☐ No ☐ Yes

Do you follow a Long-COVID rehabilitation program? ☐ No ☐ Yes

## Document S2. Long-covid questionnaire for children

### PEDIATRIC PATIENT

#### Demographic data

Patient ID: \_\_\_\_\_

Sex: ☐ Male ☐ Female

Date of birth: \_\_ / \_\_ / \_\_\_\_

Ethnicity: ☐ Arab ☐ Black ☐ Asiatic ☐ Latin American ☐ White ☐ Other: \_\_\_\_\_

#### Amnestic data

Birth weight: \_\_\_\_\_ Kg

Gestational age: \_\_\_\_\_ weeks + \_\_\_\_ days

Delivery: ☐ Vaginal ☐ Caesarean

Risk factors in pregnancy:

Mother

- ☐ Age: \_\_\_\_\_ years
- ☐ Diabetes
- ☐ Obesity
- ☐ Smoking
- ☐ Alcohol consumption
- ☐ Autoimmune diseases
- ☐ Stress
- ☐ Sedentary lifestyle
- ☐ Other: \_\_\_\_\_

Father

- ☐ Age: \_\_\_\_\_ years
- ☐ Smoking
- ☐ Alcohol consumption

Breastfeed? ☐ Yes ☐ No ☐ N/A

Weaning period: \_\_\_\_\_ months

#### SARS-CoV-2 infection data

Date of SARS-CoV-2 infection: \_\_ / \_\_ / \_\_\_\_

Variant (if known): \_\_\_\_\_

Admission in: ☐ Pediatric Unit ☐ ICU

**Vaccination**

Vaccinations appropriate for age ☐ Yes ☐ No

- Seasonal Influenza ☐ Yes ☐ No
- SARS- CoV-2 ☐ Yes ☐ No

If YES, please indicate the number of doses of SARS- CoV-2 vaccine: ☐ 1 ☐ 2 ☐ 3 ☐ >3

**Pre-existing comorbidities**

- ☐ Chronic heart disease (including congenital heart disease)
- ☐ Obesity
- ☐ Diabetes
- ☐ Asthma
- ☐ Chronic renal disease
- ☐ Rheumatological disease
- ☐ Chronic bowel disease
- ☐ Liver disease
- ☐ Neuropsychiatric disorder
- ☐ Neurological disease
- ☐ Malnutrition
- ☐ Hematologic disease
- ☐ Immunodeficiency
- ☐ Other immunological disorders
- ☐ Malignant neoplasm
- ☐ Genetic diseases
- ☐ Endocrinological diseases
- ☐ Other: \_\_\_\_\_

**Long-COVID symptoms**

Does your son/daughter have symptoms/disorders after COVID-19? ☐ Yes ☐ No

Which of these symptoms/disorders has your child had up to date?

- ☐ Fever
- ☐ Fatigue
- ☐ Inappetence
- ☐ Nasal congestion/ rhinitis
- ☐ Sore throat
- ☐ Wheezing
- ☐ Cough
- ☐ Dyspnea
- ☐ Tachycardia
- ☐ Chest tightness
- ☐ Chest pain
- ☐ Myalgia
- ☐ Joints pain and/or swelling
- ☐ Headache
- ☐ Dizziness
- ☐ Mood disorders
- ☐ Cognitive disorders
- ☐ Difficulty concentrating
- ☐ Alteration of smell
- ☐ Alteration of taste
- ☐ Sleep problems
- ☐ Increased need for sleep
- ☐ Sensory/ motor symptoms
- ☐ Weight loss

- ☐ Diarrhea
- ☐ Gastric pain
- ☐ Abdominal pain
- ☐ Constipation
- ☐ Skin rashes/ lesions
- ☐ Other: \_\_\_\_\_

Since the symptoms have been reported, how long did your child have them? \_\_\_\_\_

Has your son/daughter been unable to go to school because of these symptoms? ☐Yes ☐No

Have your child taken/is your child taking medications to treat these symptoms? ☐Yes ☐No

If YES, specify which medications: \_\_\_\_\_
